# Supplementary material for: Electron ionization induced fragmentation pathways of trichloroanisole
Source: Royal Society of Chemistry journal article supplement (doi:10.1039/d3cp02019c), 2023-01-01
Supplement: d3cp02019c1.pdf [file d3cp02019c1.pdf]

## Supplementary Information

### Electron ionization induced fragmentation pathways of Trichloroanisole

Mónica Mendes,<sup>a</sup> Daniel Bou-Debes,<sup>b</sup> Samuel Eden,<sup>b</sup> Nenad Bundaleski,<sup>a</sup> Orlando M. N. D. Teodoro,<sup>a</sup> Lucas M. Cornetta,<sup>c,\*</sup> and Filipe Ferreira da Silva<sup>a,\*</sup>

<sup>a</sup> CEFITEC, Department of Physics, Nova School of Sciences and Technology, Caparica P-2829-516, Portugal

<sup>b</sup> School of Physical Sciences, The Open University, Walton Hall, Milton Keynes, MK7 6AA, UK

<sup>c</sup> Instituto de Física Gleb Wataghin, Universidade Estadual de Campinas, Campinas, São Paulo, Brazil

\* Correspondence: lucascor@unicamp.br (LC); f.ferreiradasilva@fct.unl.pt (FFS).

**Table S1.** List of the observed cationic fragments under electron ionization at 70 eV incident electron energy (iso = isotope).

| Cation | m/Z                                                                                                                 | Cation | m/Z                                                                                                            | Cation | m/Z                                                                                                               | Cation | m/Z                                                              |
|--------|---------------------------------------------------------------------------------------------------------------------|--------|----------------------------------------------------------------------------------------------------------------|--------|-------------------------------------------------------------------------------------------------------------------|--------|------------------------------------------------------------------|
| 29     | CHO <sup>+</sup>                                                                                                    | 66     | CH <sub>3</sub> ClO <sup>+</sup> / C <sub>5</sub> H <sub>2</sub> Cl <sub>2</sub> <sup>2+</sup>                 | 109    | C <sub>3</sub> HCl <sub>2</sub> <sup>+</sup> iso / C <sub>3</sub> H <sub>3</sub> Cl <sub>2</sub> <sup>+</sup>     | 160    | C <sub>6</sub> H <sub>2</sub> Cl <sub>2</sub> O <sup>+</sup>     |
| 30     | CH <sub>2</sub> O <sup>+</sup>                                                                                      | 66.5   | C <sub>5</sub> HCl <sub>2</sub> <sup>2+</sup> iso                                                              | 110    | C <sub>3</sub> H <sub>2</sub> Cl <sub>2</sub> <sup>+</sup> iso                                                    | 162    | C <sub>6</sub> H <sub>2</sub> Cl <sub>2</sub> O <sup>+</sup> iso |
| 31     | CH <sub>3</sub> O <sup>+</sup>                                                                                      | 67     | C <sub>5</sub> H <sub>2</sub> Cl <sub>2</sub> <sup>2+</sup> iso                                                | 111    | C <sub>3</sub> HCl <sub>2</sub> <sup>+</sup> iso / C <sub>3</sub> H <sub>3</sub> Cl <sub>2</sub> <sup>+</sup> iso | 167    | C <sub>5</sub> H <sub>2</sub> Cl <sub>3</sub> <sup>+</sup>       |
| 32     | Cont. O <sub>2</sub> <sup>+</sup>                                                                                   | 68     | C <sub>5</sub> H <sub>2</sub> Cl <sub>2</sub> <sup>2+</sup> iso                                                | 112    | C <sub>3</sub> H <sub>2</sub> Cl <sub>2</sub> <sup>+</sup> iso                                                    | 168    | C <sub>5</sub> H <sub>2</sub> Cl <sub>3</sub> <sup>+</sup> iso   |
| 35     | Cl <sup>+</sup>                                                                                                     | 71     | C <sub>3</sub> Cl <sup>+</sup>                                                                                 | 113    | C <sub>3</sub> H <sub>3</sub> Cl <sub>2</sub> <sup>+</sup> iso                                                    | 169    | C <sub>5</sub> H <sub>2</sub> Cl <sub>3</sub> <sup>+</sup> iso   |
| 36     | ClH <sup>+</sup>                                                                                                    | 71.5   | Cl <sub>3</sub> C <sub>3</sub> H <sub>2</sub> <sup>2+</sup>                                                    | 114    | C <sub>3</sub> H <sub>3</sub> Cl <sub>2</sub> <sup>+</sup> iso                                                    | 170    | C <sub>5</sub> H <sub>2</sub> Cl <sub>3</sub> <sup>+</sup> iso   |
| 37     | ClH <sub>2</sub> <sup>+</sup>                                                                                       | 72     | C <sub>3</sub> HCl <sup>+</sup>                                                                                | 117    | CCl <sub>3</sub> <sup>+</sup>                                                                                     | 171    | C <sub>5</sub> H <sub>2</sub> Cl <sub>3</sub> <sup>+</sup> iso   |
| 38     | C <sub>3</sub> H <sub>2</sub> <sup>+</sup>                                                                          | 72.5   | Cl <sub>3</sub> C <sub>3</sub> H <sub>2</sub> <sup>2+</sup> iso                                                | 118    | CHCl <sub>3</sub> <sup>+</sup>                                                                                    | 172    | C <sub>5</sub> H <sub>2</sub> Cl <sub>3</sub> <sup>+</sup> iso   |
| 43     | C <sub>2</sub> H <sub>3</sub> O <sup>+</sup>                                                                        | 73     | C <sub>3</sub> H <sub>2</sub> Cl <sup>+</sup>                                                                  | 119    | CCl <sub>3</sub> <sup>+</sup> iso                                                                                 | 173    | C <sub>5</sub> H <sub>2</sub> Cl <sub>3</sub> <sup>+</sup> iso   |
| 44     | C <sub>2</sub> H <sub>4</sub> O <sup>+</sup>                                                                        | 74     | C <sub>3</sub> H <sub>3</sub> Cl <sup>+</sup>                                                                  | 120    | CHCl <sub>3</sub> <sup>+</sup> iso                                                                                | 175    | (M-Cl) <sup>+</sup>                                              |
| 45     | C <sub>2</sub> H <sub>5</sub> O <sup>+</sup>                                                                        | 75     | C <sub>3</sub> H <sub>4</sub> Cl <sup>+</sup> / C <sub>6</sub> H <sub>3</sub> <sup>+</sup>                     | 121    | CCl <sub>3</sub> <sup>+</sup> iso                                                                                 | 177    | (M-Cl) <sup>+</sup> iso                                          |
| 47     | CCl <sup>+</sup>                                                                                                    | 76     | C <sub>3</sub> H <sub>5</sub> Cl <sup>+</sup> / C <sub>6</sub> H <sub>4</sub> <sup>+</sup>                     | 122    | CHCl <sub>3</sub> <sup>+</sup> iso                                                                                | 179    | (M-OCH <sub>3</sub> ) <sup>+</sup>                               |
| 48     | CHCl <sup>+</sup>                                                                                                   | 77     | C <sub>2</sub> H <sub>2</sub> ClO <sup>+</sup>                                                                 | 123    | CCl <sub>3</sub> <sup>+</sup> iso                                                                                 | 180    | (M-OCH <sub>3</sub> ) <sup>+</sup> iso                           |
| 49     | CH <sub>2</sub> Cl <sup>+</sup>                                                                                     | 83     | CHCl <sub>2</sub> <sup>+</sup>                                                                                 | 124    | C <sub>7</sub> H <sub>5</sub> Cl <sup>+</sup>                                                                     | 181    | (M-OCH <sub>3</sub> ) <sup>+</sup> iso                           |
| 50     | CH <sub>3</sub> Cl <sup>+</sup>                                                                                     | 84     | CH <sub>2</sub> Cl <sub>2</sub> <sup>+</sup> / Cl <sub>3</sub> C <sub>5</sub> H <sub>2</sub> <sup>2+</sup> iso | 125    | ?                                                                                                                 | 182    | (M-OCH <sub>3</sub> ) <sup>+</sup> iso                           |
| 51     | ClO <sup>+</sup> ?                                                                                                  | 84.5   | Cl <sub>3</sub> C <sub>5</sub> H <sub>2</sub> <sup>2+</sup> iso                                                | 126    | C <sub>7</sub> H <sub>5</sub> Cl <sup>+</sup> iso                                                                 | 183    | (M-OCH <sub>3</sub> ) <sup>+</sup> iso                           |
| 53     | C <sub>4</sub> H <sub>5</sub> <sup>+</sup>                                                                          | 85     | CHCl <sub>2</sub> <sup>+</sup> iso / Cl <sub>3</sub> C <sub>5</sub> H <sub>2</sub> <sup>2+</sup> iso           | 127    | ?                                                                                                                 | 195    | (M-CH <sub>3</sub> ) <sup>+</sup>                                |
| 54     | C <sub>3</sub> H <sub>2</sub> O <sup>+</sup>                                                                        | 85.5   | Cl <sub>3</sub> C <sub>5</sub> H <sub>2</sub> <sup>2+</sup> iso                                                | 130    | C <sub>2</sub> HCl <sub>3</sub> <sup>+</sup>                                                                      | 196    | (M-CH <sub>3</sub> ) <sup>+</sup> iso                            |
| 54.5   | C <sub>3</sub> HCl <sub>2</sub> <sup>2+</sup> iso / C <sub>3</sub> H <sub>3</sub> Cl <sub>2</sub> <sup>2+</sup>     | 86     | CH <sub>2</sub> Cl <sub>2</sub> <sup>+</sup> iso / Cl <sub>2</sub> O <sup>+</sup>                              | 131    | C <sub>5</sub> HCl <sub>2</sub> <sup>+</sup>                                                                      | 197    | (M-CH <sub>3</sub> ) <sup>+</sup> iso                            |
| 55     | C <sub>3</sub> H <sub>2</sub> Cl <sub>2</sub> <sup>2+</sup> iso                                                     | 87     | CHCl <sub>2</sub> <sup>+</sup> iso                                                                             | 132    | C <sub>5</sub> H <sub>2</sub> Cl <sub>2</sub> <sup>+</sup>                                                        | 198    | (M-CH <sub>3</sub> ) <sup>+</sup> iso                            |
| 55.5   | C <sub>3</sub> HCl <sub>2</sub> <sup>2+</sup> iso / C <sub>3</sub> H <sub>3</sub> Cl <sub>2</sub> <sup>2+</sup> iso | 89     | ?                                                                                                              | 133    | C <sub>5</sub> HCl <sub>2</sub> <sup>+</sup> iso                                                                  | 199    | (M-CH <sub>3</sub> ) <sup>+</sup> iso                            |
| 56     | C <sub>3</sub> H <sub>4</sub> O <sup>+</sup>                                                                        | 90     | ?                                                                                                              | 134    | C <sub>5</sub> H <sub>2</sub> Cl <sub>2</sub> <sup>+</sup> iso                                                    | 200    | (M-CH <sub>3</sub> ) <sup>+</sup> iso                            |
| 57     | C <sub>3</sub> H <sub>5</sub> O <sup>+</sup>                                                                        | 95     | C <sub>5</sub> Cl <sup>+</sup>                                                                                 | 135    | C <sub>5</sub> HCl <sub>2</sub> <sup>+</sup> iso                                                                  | 201    | (M-CH <sub>3</sub> ) <sup>+</sup> iso                            |
| 58     | ?                                                                                                                   | 96     | C <sub>2</sub> H <sub>2</sub> Cl <sub>2</sub> <sup>+</sup>                                                     | 136    | C <sub>5</sub> H <sub>2</sub> Cl <sub>2</sub> <sup>+</sup> iso                                                    | 210    | M <sup>+</sup>                                                   |
| 59     | ?                                                                                                                   | 97     | C <sub>2</sub> H <sub>3</sub> Cl <sub>2</sub> <sup>+</sup>                                                     | 141    | ?                                                                                                                 | 211    | M <sup>+</sup> iso                                               |
| 60     | C <sub>2</sub> HCl <sup>+</sup>                                                                                     | 98     | C <sub>2</sub> H <sub>3</sub> Cl <sub>2</sub> <sup>+</sup> iso                                                 | 143    | C <sub>3</sub> H <sub>2</sub> Cl <sub>3</sub> <sup>+</sup>                                                        | 212    | M <sup>+</sup> iso                                               |
| 61     | C <sub>5</sub> H <sup>+</sup> / C <sub>2</sub> H <sub>2</sub> Cl <sup>+</sup>                                       | 99     | C <sub>2</sub> H <sub>3</sub> Cl <sub>2</sub> <sup>+</sup> iso                                                 | 144    | C <sub>3</sub> H <sub>2</sub> Cl <sub>3</sub> <sup>+</sup> iso                                                    | 213    | M <sup>+</sup> iso                                               |
| 62     | C <sub>5</sub> H <sub>2</sub> <sup>+</sup>                                                                          | 100    | C <sub>2</sub> H <sub>3</sub> Cl <sub>2</sub> <sup>+</sup> iso                                                 | 145    | C <sub>3</sub> H <sub>2</sub> Cl <sub>3</sub> <sup>+</sup> iso                                                    | 214    | M <sup>+</sup> iso                                               |
| 63     | C <sub>2</sub> H <sub>2</sub> Cl <sup>+</sup> iso                                                                   | 105    | M <sup>2+</sup>                                                                                                | 146    | C <sub>3</sub> H <sub>2</sub> Cl <sub>3</sub> <sup>+</sup> iso                                                    | 215    | M <sup>+</sup> iso                                               |
| 65     | ?                                                                                                                   | 105.5  | M <sup>2+</sup> iso                                                                                            | 147    | C <sub>3</sub> H <sub>2</sub> Cl <sub>3</sub> <sup>+</sup> iso                                                    | 216    | M <sup>+</sup> iso                                               |
| 65.5   | C <sub>5</sub> HCl <sub>2</sub> <sup>2+</sup>                                                                       | 106    | M <sup>2+</sup> iso                                                                                            | 148    | C <sub>3</sub> H <sub>2</sub> Cl <sub>3</sub> <sup>+</sup> iso                                                    |        |                                                                  |



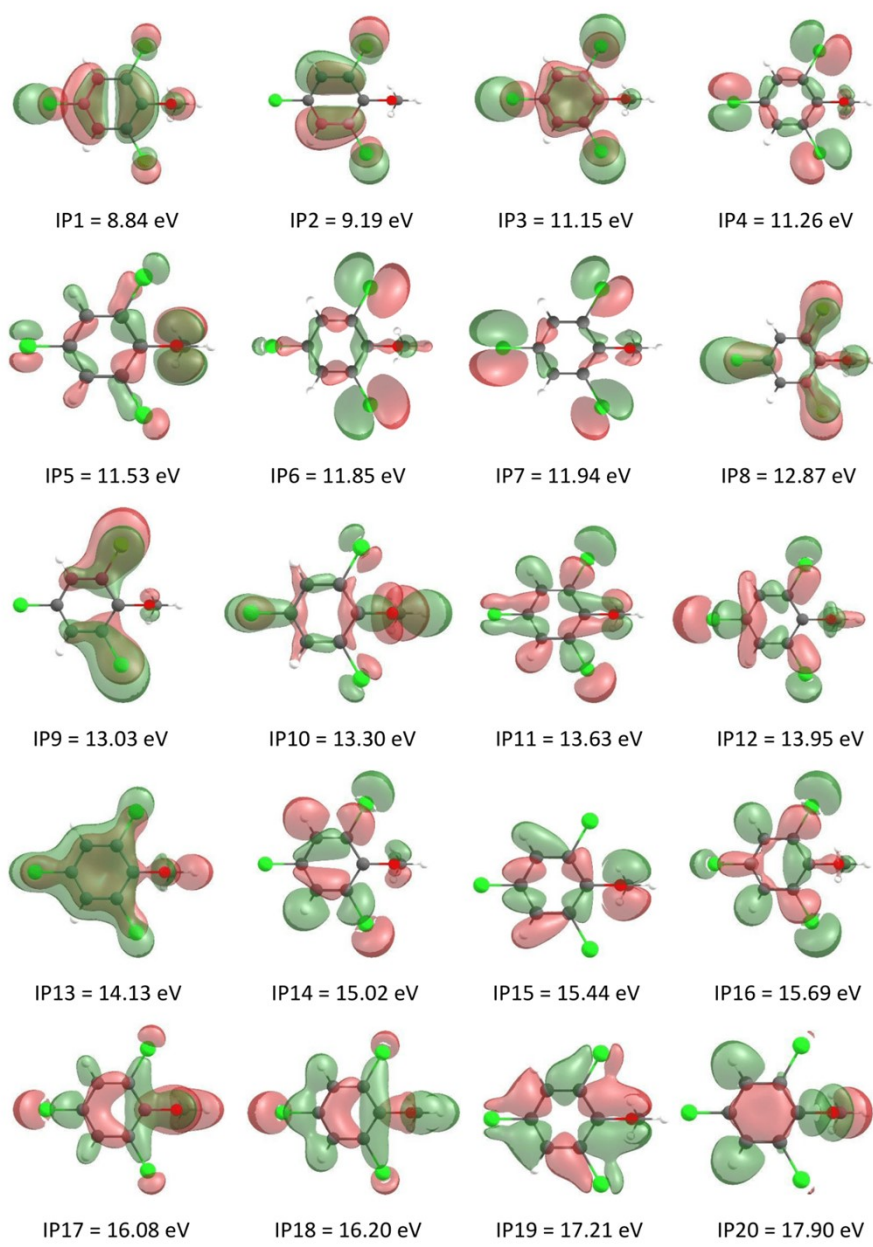

**Fig. S1.** Twenty first ionization potentials of TCA, in eV, and the corresponding molecular orbitals. The IPs were obtained at the EPT-OVGF/6-311G++(2df,2p) level of theory. The IPs correspond to molecular orbitals HOMO to HOMO-19 and IP1 is related to the threshold for the formation of the parent cation.

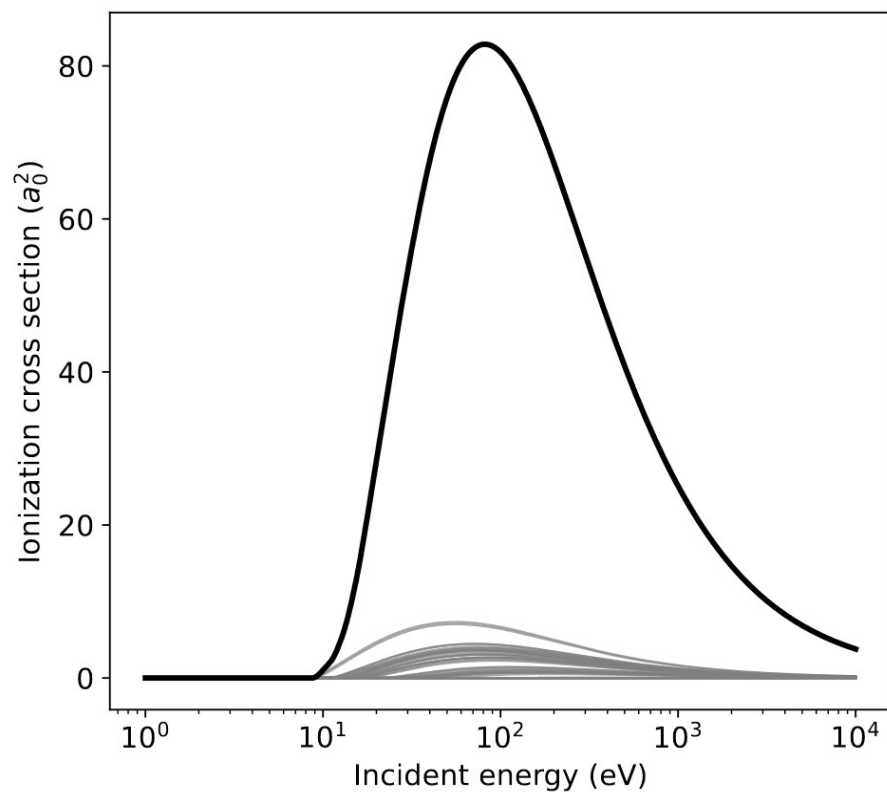

**Fig. S2.** Total ionization cross section for the electron impact ionization, in  $a_0^2$ , as a function of the incident electron energy, in eV. The thin gray lines denote the ionization cross section from each molecular orbital individually, while the black line is the sum over all molecular orbitals (TICS).

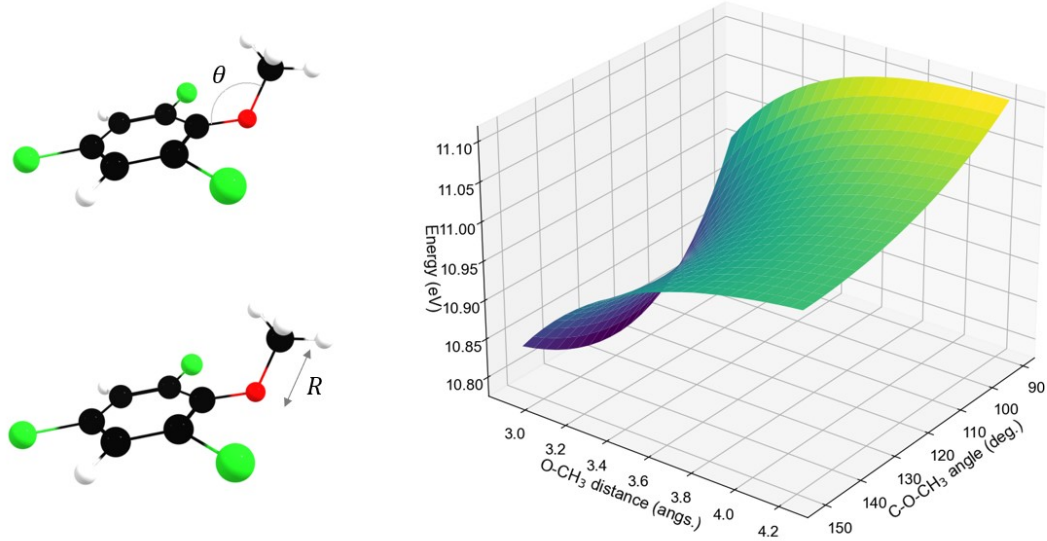

**Fig. S3.** Two-dimensional potential energy surface, in eV, for the lowest-lying cationic TCA against the O-CH<sub>3</sub> bond length and the C-O-CH<sub>3</sub> planar angle. The plot focused on the dissociation region. The calculations were done at the DFT/B3LYP/aug-cc-pVTZ level of theory.

**Table S2.** Wannier-type fitting parameters obtained for the experimental thresholds of the ten most abundant cations for

three different measurements. The Wannier function is defined by  $f(E) = \begin{cases} b + a(E - AE)^d & E \geq AE \\ b & E < AE \end{cases}$ , where  $E$  represents the electron energy and  $b$ ,  $a$ ,  $d$ , and  $AE$  are variable fitting parameters.

| Measurement 1 | Wannier-type fitting parameters |      |       |      |
|---------------|---------------------------------|------|-------|------|
| m/Z           | a                               | b    | AE    | d    |
| 210           | 2.14                            | 0.44 | 8.68  | 4.02 |
| 195           | 0.36                            | 0.14 | 10.57 | 6.04 |
| 167           | 32.03                           | 0.15 | 14.39 | 2.05 |
| 143           | 0.16                            | 0.09 | 16.35 | 3.30 |
| 107           | 0.17                            | 0.03 | 15.97 | 3.79 |
| 97            | 0.24                            | 0.91 | 16.58 | 3.16 |
| 74            | 0.08                            | 0.18 | 18.73 | 2.98 |
| 73            | 0.67                            | 0.20 | 17.72 | 2.14 |
| 62            | 0.002                           | 0.24 | 20.08 | 4.88 |
| 61            | 0.001                           | 0.45 | 17.24 | 3.90 |
| Measurement 2 | Wannier-type fitting parameters |      |       |      |
| m/Z           | a                               | b    | AE    | d    |
| 210           | 1.15                            | 0.59 | 9.12  | 3.82 |
| 195           | 0.51                            | 0.32 | 10.92 | 4.73 |
| 167           | 8.85                            | 0.27 | 14.34 | 2.31 |
| 143           | 0.19                            | 0.20 | 16.93 | 3.05 |
| 107           | 0.01                            | 0.30 | 15.52 | 4.94 |
| 97            | 0.11                            | 0.59 | 16.52 | 3.33 |
| 74            | 0.02                            | 0.23 | 18.22 | 3.17 |
| 73            | 0.32                            | 0.25 | 17.55 | 2.11 |
| 62            | 0.005                           | 0.22 | 20.60 | 4.18 |
| 61            | 0.001                           | 0.41 | 18.39 | 3.67 |
| Measurement 3 | Wannier-type fitting parameters |      |       |      |
| m/Z           | a                               | b    | AE    | d    |
| 210           | 1.71                            | 0.26 | 8.57  | 1.87 |
| 195           | 0.13                            | 0.15 | 10.52 | 2.86 |
| 167           | 0.16                            | 0.16 | 14.27 | 2.47 |
| 143           | 0.06                            | 0.16 | 18.28 | 2.74 |
| 107           | 0.002                           | 0.13 | 15.26 | 4.43 |
| 97            | 0.01                            | 0.16 | 16.68 | 3.79 |
| 74            | 0.01                            | 0.18 | 18.72 | 3.50 |
| 73            | 0.06                            | 0.18 | 17.71 | 2.42 |
| 62            | 0.001                           | 0.21 | 20.13 | 4.54 |
| 61            | 0.001                           | 0.22 | 17.78 | 3.68 |

**Table S3.** Appearance energy values of the three measurements and the corresponding average value.

| <b>m/Z</b> | <b>Measurement 1</b> | <b>Measurement 2</b> | <b>Measurement 3</b> | <b>Average</b> |
|------------|----------------------|----------------------|----------------------|----------------|
| 210        | 8.68                 | 9.12                 | 8.57                 | 8.79           |
| 195        | 10.57                | 10.92                | 10.52                | 10.67          |
| 167        | 14.39                | 14.34                | 14.27                | 14.33          |
| 143        | 16.35                | 16.93                | 18.28                | 16.64          |
| 107        | 15.97                | 15.52                | 15.26                | 15.49          |
| 97         | 16.58                | 16.52                | 16.68                | 16.59          |
| 74         | 18.73                | 18.22                | 18.72                | 18.56          |
| 73         | 17.72                | 17.55                | 17.71                | 17.66          |
| 62         | 20.08                | 20.60                | 20.13                | 20.27          |
| 61         | 17.24                | 18.39                | 17.78                | 17.80          |
